# Supplementary material
Source: Elsevier journal article supplement (https://tobaccoendgame.my/wp-content/uploads/2023/05/mmc1.pdf)
Supplement: mmc1 [file mmc1.pdf]

## Supplementary materials

**Study title:** Longitudinal transitions in e-cigarette and cigarette use among US adults:  
Prospective cohort study

**Authors:** Mohammad Ebrahimi Kalan, Ph.D., Noel T. Brewer, Ph.D.

### Table of Contents

|                                                                                                                                                        |    |
|--------------------------------------------------------------------------------------------------------------------------------------------------------|----|
| Weighted data presentation.....                                                                                                                        | 2  |
| Abbreviations .....                                                                                                                                    | 2  |
| <b>Supplementary Table 1.</b> Tobacco products use definitions, PATH Study .....                                                                       | 3  |
| <b>Supplementary Table 2.</b> Definitions of behavioral transitions in ENDS or cigarettes use, PATH Study .....                                        | 4  |
| <b>Supplementary Table-3.</b> Items for internalizing and externalizing symptoms, PATH Study .....                                                     | 5  |
| <b>Supplementary Figure 1.</b> Study Flow Diagram .....                                                                                                | 6  |
| <b>Supplementary Table 4.</b> Multivariable analysis of ENDS or cigarettes use initiation among adults across W3-W4 and W4-W5, PATH Study .....        | 7  |
| <b>Supplementary Table 5.</b> Multivariable analysis of relapse in ENDS or cigarette use among adults across W3-W4 and W4-W5, PATH Study .....         | 8  |
| <b>Supplementary Table 6.</b> Multivariable analysis of progression in ENDS and cigarettes use among adults across W3-W4 and W4-W5, PATH Study .....   | 9  |
| <b>Supplementary Table 7.</b> Multivariable analysis of ENDS or cigarettes use cessation among adults across W3-W4 and W4-W5, PATH Study .....         | 10 |
| <b>Supplementary Figure 2.</b> Between products (ENDS to cigarettes or vice versa) transitions from W3-W4 (above) and W4-W5 (bottom), PATH Study ..... | 11 |

## **Weighted data presentation**

All percentages presented in this supplementary are weighted using SAS procedures to provide nationally representative estimates of US adults and unbiased measures, adjusting for differences in selection probability and nonresponse while accounting for design features.

## **Abbreviations**

PATH=Population Assessment on Tobacco and Health

ENDS=Electronic nicotine delivery system

W=Wave

Wt%=Weighted percentages

AOR= Adjusted odds ratio

CI=Confidence interval,

Ref=Reference

LGB= Lesbian, Gay, Bisexual, or Something else

**Supplementary Table 1. Tobacco products use definitions, PATH Study**

| <b>Product</b>    | <b>Use status</b>        | <b>Definitions</b>                                                                                                                         |
|-------------------|--------------------------|--------------------------------------------------------------------------------------------------------------------------------------------|
| <b>ENDS</b>       | Never use                | Never used ENDS, even once.                                                                                                                |
|                   | Ever use                 | Have ever used any ENDS                                                                                                                    |
|                   | Former established use   | Have ever used any ENDS products fairly regularly and have not used them within the past 12 months or currently do not use at all.         |
|                   | Former experimental use  | Have never used any ENDS fairly regularly, have not used them within the past 12 months or currently use not at all.                       |
|                   | Current established use  | Have ever used any ENDS, have ever used them fairly regularly, and currently use every day or some days.                                   |
|                   | Current experimental use | Have never used any ENDS fairly regularly, and currently use every day or some days.                                                       |
|                   | Daily use                | Have ever used any ENDS, have ever used them fairly regularly, and currently use every day.                                                |
|                   | Some days use            | Have ever used any ENDS, have ever used them fairly regularly, and currently use some days.                                                |
| <b>Cigarettes</b> | Never use                | Never used cigarettes, even once.                                                                                                          |
|                   | Ever use                 | Have ever smoked a cigarette, used <100 cigarettes in lifetime                                                                             |
|                   | Former established use   | Have smoked at least 100 cigarettes in their lifetime, and have not smoked them within the past 12 months or currently smoke not at all.   |
|                   | Former experimental use  | Have not smoked at least 100 cigarettes in their lifetime, and did not smoke them within the past 12 months or currently smoke not at all. |
|                   | Current established use  | Have smoked at least 100 cigarettes in their lifetime, and currently smoke every day or some days                                          |
|                   | Current experimental use | Have not smoked at least 100 cigarettes in their lifetime, and currently smoke every day or some days                                      |
|                   | Daily use                | Have smoked at least 100 cigarettes in their lifetime, and currently smoke every day                                                       |
|                   | Some days use            | Have smoked at least 100 cigarettes in their lifetime, and currently smoke some days                                                       |

**Supplementary Table 2.** Definitions of behavioral transitions in ENDS or cigarettes use, PATH Study

| <b>Behavioral transitions</b> | <b>Definitions</b>                                                                                                                                                  | <b>Coded</b>  |
|-------------------------------|---------------------------------------------------------------------------------------------------------------------------------------------------------------------|---------------|
| <b>Initiation</b>             | Transition from never use to ever use of [ENDS/cigarettes] across timepoints.                                                                                       | 0=no or 1=yes |
| <b>Relapse</b>                | Transition from former established or experimental use of [ENDS/cigarettes] to current established or experimental use of [ENDS/cigarettes] across timepoints.      | 0=no or 1=yes |
| <b>Progression</b>            | Transition from some days established use to everyday established use, or from current experimental use to some days or everyday established use across timepoints. | 0=no or 1=yes |
| <b>Cessation</b>              | Transition from current established or current experimental use of [ENDS/cigarettes] to former use across timepoints.                                               | 0=no or 1=yes |

### Supplementary Table-3. Items for internalizing and externalizing symptoms, PATH Study

---

#### Internalizing Symptoms\*

When was the last time that you had significant problems with ...

- 1) Feeling very trapped, lonely, sad, blue, depressed, or hopeless about the future?
- 2) Sleep trouble, such as bad dreams, sleeping restlessly, or falling asleep during the day?
- 3) Feeling very anxious, nervous, tense, scared, panicked, or like something bad was going to happen?
- 4) Becoming very distressed and upset when something reminded you of the past?

#### Externalizing Symptoms

When was the last time that you did any of the following things two or more

- 1) Lied or conned to get things you wanted or to avoid having to do something?
- 2) Had a hard time paying attention at school, work, or home?
- 3) Had a hard time listening to instructions at school, work, or home?
- 4) Were a bully or threatened other people?
- 5) Started physical fights with other people?
- 6) Felt restless or the need to run around or climb on things?
- 7) Gave answers before the other person finished asking the question?

---

\*Response options for all questions were: "0" (never), "1" (over a year ago), "2" (2 to 12 months). Participants were grouped into two categories: those who never reported any problems (coded as 0) and those who reported at least one problem in the past 12 months or more (coded as 1).

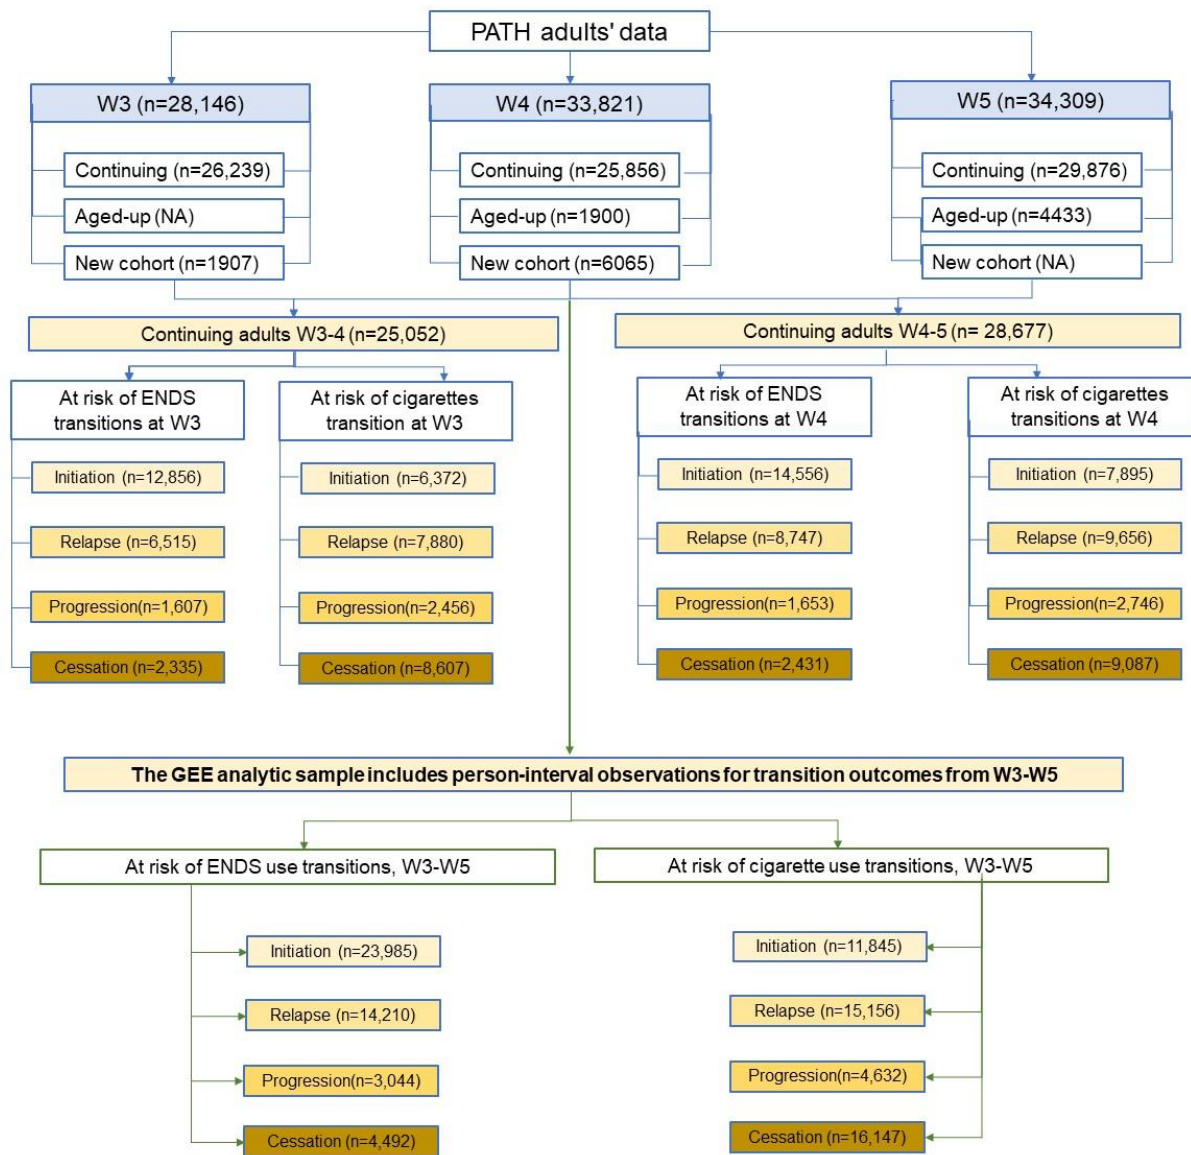

**Supplementary Figure 1. Study Flow Diagram**

**Supplementary Table 4.** Multivariable analysis of ENDS or cigarettes use initiation among adults across W3-W4 and W4-W5, PATH Study

| Characteristics                                             | Initiation of ENDS use  |                         | Initiation of cigarette use |                          |
|-------------------------------------------------------------|-------------------------|-------------------------|-----------------------------|--------------------------|
|                                                             | Waves 3-4<br>n=12,856   | Waves 4-5<br>n=14,556   | Waves 3-4<br>n=6,372        | Waves 4-5<br>N=7,895     |
|                                                             | aOR (95% CI)            | aOR (95% CI)            | aOR (95% CI)                | aOR (95% CI)             |
| <b>Age group</b>                                            |                         |                         |                             |                          |
| 18–24                                                       | Ref                     | Ref                     | Ref                         | Ref                      |
| 25–44                                                       | <b>0.26 (0.16-0.41)</b> | <b>0.19 (0.14-0.25)</b> | 0.17 (0.09-0.31)            | 0.14 (0.08-0.25)         |
| 45–64                                                       | <b>0.17 (0.10-0.28)</b> | <b>0.09 (0.06-0.14)</b> | ¥                           | ¥                        |
| 65+                                                         | <b>0.03 (0.01-0.07)</b> | <b>0.04 (0.02-0.07)</b> | ¥                           | ¥                        |
| <b>Sex</b>                                                  |                         |                         |                             |                          |
| <b>Female</b>                                               | Ref                     | Ref                     | Ref                         | Ref                      |
| <b>Male</b>                                                 | 1.07 (0.74-1.55)        | 1.26 (0.97-1.64)        | <b>2.12 (1.17-3.85)</b>     | <b>1.54 (1.03-2.31)</b>  |
| <b>Sexual Orientation</b>                                   |                         |                         |                             |                          |
| Straight                                                    | Ref                     | Ref                     | Ref                         | Ref                      |
| LGB                                                         | 1.23 (0.81-1.88)        | 1.28 (0.70-2.35)        | <b>0.48 (0.25-0.90)</b>     | 1.84 (0.98-3.46)         |
| Not reported                                                | ¥                       | 0.21 (0.01-3.03)        | 1.31 (0.17-10.15)           | 4.17 (0.98-17.82)        |
| <b>Race/ethnicity</b>                                       |                         |                         |                             |                          |
| Non-Hispanic White                                          | Ref                     | Ref                     | Ref                         | Ref                      |
| Non-Hispanic Black                                          | 1.11 (0.70-1.77)        | 1.19 (0.80-1.78)        | 1.32 (0.64-2.69)            | 0.81 (0.46-1.42)         |
| Hispanic                                                    | 1.31 (0.82-2.08)        | <b>1.38 (1.00-1.90)</b> | 1.57 (0.90-2.73)            | 1.43 (0.82-2.49)         |
| Other races                                                 | 0.77 (0.36-1.61)        | 0.71 (0.48-1.06)        | 1.69 (0.44-6.56)            | 1.66 (0.70-3.94)         |
| <b>Educational</b>                                          |                         |                         |                             |                          |
| Less than high school                                       | Ref                     | Ref                     | Ref                         | Ref                      |
| High school graduate                                        | 0.88 (0.53-1.46)        | 0.85 (0.61-1.19)        | 0.76 (0.39-1.50)            | 0.51 (0.25-1.03)         |
| Some college                                                | 0.88 (0.55-1.40)        | 0.99 (0.70-1.40)        | 0.66 (0.32-1.35)            | 0.56 (0.29-1.11)         |
| Bachelor's degree or more                                   | 0.57 (0.30-1.06)        | <b>0.62 (0.41-0.94)</b> | 0.61 (0.20-1.84)            | <b>0.29 (0.09-0.97)</b>  |
| <b>Income</b>                                               |                         |                         |                             |                          |
| Less than \$25,000                                          | Ref                     | Ref                     | Ref                         | Ref                      |
| \$25,000 to \$49,999                                        | 0.91 (0.55-1.49)        | 1.37 (0.94-1.99)        | <b>0.45 (0.20-0.99)</b>     | 1.06 (0.57-1.98)         |
| \$50,000 to \$99,999                                        | 0.97 (0.56-1.70)        | 1.13 (0.77-1.66)        | 0.52 (0.25-1.08)            | <b>0.39 (0.22-0.73)</b>  |
| \$100,000 or more                                           | 0.96 (0.54-1.71)        | 1.54 (0.96-2.47)        | 1.21 (0.58-2.52)            | 0.69 (0.37-1.28)         |
| Not reported                                                | 0.90 (0.44-1.86)        | 1.23 (0.64-2.35)        | 0.97 (0.43-2.16)            | 0.51 (0.22-1.19)         |
| <b>Internalizing symptoms</b>                               |                         |                         |                             |                          |
| No                                                          | Ref                     | Ref                     | Ref                         | Ref                      |
| Yes                                                         | <b>1.77 (1.18-2.64)</b> | <b>1.72 (1.33-2.22)</b> | 1.32 (0.79-2.23)            | <b>1.61 (1.01-2.56)</b>  |
| <b>Externalizing symptoms</b>                               |                         |                         |                             |                          |
| No                                                          | Ref                     | Ref                     | Ref                         | Ref                      |
| Yes                                                         | 1.00 (0.51-1.97)        | 1.28 (0.73-2.24)        | 0.50 (0.16-1.58)            | 1.07 (0.67-1.73)         |
| <b>Current use of cigarettes/ENDS <sup>a</sup></b>          |                         |                         |                             |                          |
| No                                                          | Ref                     | Ref                     | Ref                         | Ref                      |
| Yes                                                         | <b>5.56 (3.70-8.37)</b> | <b>5.13 (3.39-7.78)</b> | 2.97 (0.91-9.63)            | <b>6.83 (1.04-44.78)</b> |
| <b>Current other tobacco use</b>                            |                         |                         |                             |                          |
| No                                                          | Ref                     | Ref                     | Ref                         | Ref                      |
| Yes                                                         | <b>2.88 (1.73-4.81)</b> | <b>2.08 (1.27-3.41)</b> | 1.80 (0.52-6.16)            | <b>2.74 (1.08-6.99)</b>  |
| <b>Past 12-month cannabis use</b>                           |                         |                         |                             |                          |
| No                                                          | Ref                     | Ref                     | Ref                         | Ref                      |
| Yes                                                         | <b>2.17 (1.36-3.46)</b> | <b>3.49 (2.47-4.93)</b> | <b>2.14 (1.21-3.78)</b>     | <b>2.17 (1.50-3.13)</b>  |
| <b>Nicotine harm perception</b>                             |                         |                         |                             |                          |
| None or little harm                                         | Ref                     | Ref                     | Ref                         | Ref                      |
| Very harmful                                                | 1.07 (0.73-1.56)        | 0.73 (0.51-1.04)        | 0.66 (0.28-1.54)            | 1.14 (0.69-1.88)         |
| <b>ENDS/Cigarette absolute harm perception <sup>b</sup></b> |                         |                         |                             |                          |
| None or little harm                                         | Ref                     | Ref                     | Ref                         | Ref                      |
| Very harmful                                                | <b>0.64 (0.43-0.96)</b> | 0.94 (0.69-1.27)        | 0.72 (0.27-1.95)            | 0.77 (0.37-1.59)         |
| <b>Comparative harm perception</b>                          |                         |                         |                             |                          |
| Less harmful                                                | Ref                     | Ref                     | Ref                         | Ref                      |
| Equally or more harmful                                     | 0.85 (0.58-1.26)        | 1.03 (0.76-1.39)        | 0.63 (0.29-1.40)            | 0.87 (0.56-1.35)         |

Note. Regression models were weighted using wave 4 all-wave weights (for Waves 3-4) and wave 5 all-wave weights (for Waves 4-5). Bold-faced aOR indicates  $p < .05$ .

<sup>a</sup> First two columns show current established cigarettes smoking and the last two columns show current established ENDS use.

<sup>b</sup> First two columns indicate ENDS absolute harm perception, and the last two columns indicate cigarettes' absolute harm perception. ¥ No observation was in this category or the model did not converge.

**Supplementary Table 5.** Multivariable analysis of relapse in ENDS or cigarette use among adults across W3-W4 and W4-W5, PATH Study

| Characteristics                                             | Relapse of ENDS use                  |                                      | Relapse of cigarette use             |                                      |
|-------------------------------------------------------------|--------------------------------------|--------------------------------------|--------------------------------------|--------------------------------------|
|                                                             | Waves 3-4<br>n=6,515<br>aOR (95% CI) | Waves 4-5<br>n=8,747<br>aOR (95% CI) | Waves 3-4<br>n=7,880<br>aOR (95% CI) | Waves 4-5<br>N=7,895<br>aOR (95% CI) |
| <b>Age group</b>                                            |                                      |                                      |                                      |                                      |
| 18-24                                                       | Ref                                  | Ref                                  | Ref                                  | Ref                                  |
| 25-44                                                       | <b>0.70 (0.54-0.92)</b>              | <b>0.45 (0.35-0.59)</b>              | <b>0.62 (0.47-0.82)</b>              | <b>0.59 (0.44-0.79)</b>              |
| 45-64                                                       | <b>0.48 (0.34-0.68)</b>              | <b>0.28 (0.19-0.42)</b>              | <b>0.26 (0.18-0.37)</b>              | <b>0.27 (0.18-0.39)</b>              |
| 65+                                                         | 0.62 (0.31-1.23)                     | <b>0.27 (0.12-0.60)</b>              | <b>0.09 (0.06-0.16)</b>              | <b>0.06 (0.03-0.11)</b>              |
| <b>Sex</b>                                                  |                                      |                                      |                                      |                                      |
| Female                                                      | Ref                                  | Ref                                  | Ref                                  | Ref                                  |
| Male                                                        | 0.89 (0.68-1.17)                     | 0.93 (0.74-1.17)                     | 0.90 (0.71-1.15)                     | 0.91 (0.71-1.15)                     |
| <b>Sexual Orientation</b>                                   |                                      |                                      |                                      |                                      |
| Straight                                                    | Ref                                  | Ref                                  | Ref                                  | Ref                                  |
| LGB                                                         | 1.51 (0.99-2.29)                     | 0.99 (0.71-1.37)                     | 1.28 (0.89-1.86)                     | 1.04 (0.69-1.59)                     |
| Not reported                                                | 2.14 (0.71-6.47)                     | 1.37 (0.46-4.07)                     | 0.84 (0.15-4.72)                     | 1.78 (0.28-11.10)                    |
| <b>Race/ethnicity</b>                                       |                                      |                                      |                                      |                                      |
| Non-Hispanic White                                          | Ref                                  | Ref                                  | Ref                                  | Ref                                  |
| Non-Hispanic Black                                          | 1.49 (0.96-2.32)                     | 0.75 (0.47-1.20)                     | 1.26 (0.79-2.02)                     | 1.23 (0.86-1.77)                     |
| Hispanic                                                    | 1.55 (1.09-2.22)                     | 0.80 (0.59-1.08)                     | 1.07 (0.69-1.66)                     | 0.89 (0.64-1.24)                     |
| Other races                                                 | 1.45 (0.90-2.34)                     | 1.10 (0.77-1.57)                     | 0.80 (0.52-1.22)                     | 1.18 (0.66-2.11)                     |
| <b>Educational</b>                                          |                                      |                                      |                                      |                                      |
| Less than high school                                       | Ref                                  | Ref                                  | Ref                                  | Ref                                  |
| High school graduate                                        | 1.10 (0.76-1.61)                     | 1.02 (0.73-1.44)                     | <b>0.63 (0.42-0.95)</b>              | 0.77 (0.54-1.11)                     |
| Some college                                                | 1.00 (0.68-1.47)                     | 1.21 (0.90-1.63)                     | <b>0.48 (0.35-0.65)</b>              | <b>0.66 (0.44-0.97)</b>              |
| Bachelor's degree or more                                   | 1.09 (0.68-1.74)                     | 0.93 (0.61-1.43)                     | <b>0.42 (0.27-0.64)</b>              | <b>0.47 (0.29-0.75)</b>              |
| <b>Income</b>                                               |                                      |                                      |                                      |                                      |
| Less than \$25,000                                          | Ref                                  | Ref                                  | Ref                                  | Ref                                  |
| \$25,000 to \$49,999                                        | 1.26 (0.89-1.77)                     | 0.89 (0.67-1.19)                     | 0.87 (0.66-1.16)                     | <b>0.52 (0.37-0.73)</b>              |
| \$50,000 to \$99,999                                        | 1.05 (0.71-1.54)                     | 0.86 (0.61-1.21)                     | <b>0.66 (0.46-0.96)</b>              | <b>0.45 (0.32-0.64)</b>              |
| \$100,000 or more                                           | 1.18 (0.78-1.80)                     | 0.89 (0.61-1.30)                     | <b>0.42 (0.28-0.64)</b>              | <b>0.30 (0.19-0.48)</b>              |
| Not reported                                                | 0.95 (0.50-1.79)                     | 0.67 (0.41-1.11)                     | 0.76 (0.37-1.54)                     | 0.55 (0.27-1.15)                     |
| <b>Internalizing symptoms</b>                               |                                      |                                      |                                      |                                      |
| No                                                          | Ref                                  | Ref                                  | Ref                                  | Ref                                  |
| Yes                                                         | <b>1.33 (1.04-1.70)</b>              | 1.28 (0.99-1.67)                     | 1.08 (0.83-1.39)                     | 1.23 (0.96-1.58)                     |
| <b>Externalizing symptoms</b>                               |                                      |                                      |                                      |                                      |
| No                                                          | Ref                                  | Ref                                  | Ref                                  | Ref                                  |
| Yes                                                         | 1.05 (0.66-1.67)                     | <b>1.40 (1.00-1.94)</b>              | 0.86 (0.50-1.46)                     | 1.09 (0.68-1.76)                     |
| <b>Current use of cigarettes/ENDS <sup>a</sup></b>          |                                      |                                      |                                      |                                      |
| No                                                          | Ref                                  | Ref                                  | Ref                                  | Ref                                  |
| Yes                                                         | <b>2.47 (1.82-3.36)</b>              | <b>2.25 (1.71-2.97)</b>              | <b>3.52 (2.14-5.77)</b>              | <b>2.36 (1.51-3.68)</b>              |
| <b>Current other tobacco use</b>                            |                                      |                                      |                                      |                                      |
| No                                                          | Ref                                  | Ref                                  | Ref                                  | Ref                                  |
| Yes                                                         | <b>1.51 (1.02-2.24)</b>              | <b>1.43 (1.10-1.86)</b>              | 1.79 (1.18-2.74)                     | <b>1.72 (1.15-2.57)</b>              |
| <b>Past 12-month cannabis use</b>                           |                                      |                                      |                                      |                                      |
| No                                                          | Ref                                  | Ref                                  | Ref                                  |                                      |
| Yes                                                         | 1.28 (0.89-1.84)                     | 1.23 (0.96-1.59)                     | <b>1.81 (1.36-2.41)</b>              | <b>1.67 (1.18-2.38)</b>              |
| <b>Nicotine harm perception</b>                             |                                      |                                      |                                      |                                      |
| None or little harm                                         | Ref                                  | Ref                                  | Ref                                  | Ref                                  |
| Very harmful                                                | 0.84 (0.65-1.09)                     | 1.11 (0.85-1.46)                     | 0.91 (0.60-1.39)                     | <b>0.70 (0.51-0.94)</b>              |
| <b>ENDS/Cigarette absolute harm perception <sup>b</sup></b> |                                      |                                      |                                      |                                      |
| None or little harm                                         | Ref                                  | Ref                                  | Ref                                  | Ref                                  |
| Very harmful                                                | <b>0.64 (0.47-0.87)</b>              | 0.81 (0.63-1.05)                     | <b>0.56 (0.34-0.91)</b>              | 0.67 (0.45-1.00)                     |
| <b>Comparative harm perception</b>                          |                                      |                                      |                                      |                                      |
| Less harmful                                                | Ref                                  | Ref                                  | Ref                                  | Ref                                  |
| Equally or more harmful                                     | 0.90 (0.71-1.14)                     | <b>0.72 (0.56-0.93)</b>              | <b>1.81 (1.36-2.41)</b>              | 1.22 (0.89-1.66)                     |

Note. Regression models were weighted using wave 4 all-wave weights (for Waves 3-4) and wave 5 all-wave weights. (for Waves 4-5). Bold-faced aOR indicates  $p < .05$ .

<sup>a</sup> First two columns show current established cigarettes smoking and the last two columns show current established ENDS use.

<sup>b</sup> First two columns indicate ENDS absolute harm perception, and the last two columns indicate cigarettes' absolute harm perception.



**Supplementary Table 6.** Multivariable analysis of progression in ENDS and cigarettes use among adults across W3-W4 and W4-W5, PATH Study

| Characteristics                                            | Progression in ENDS use |                         | Progression in cigarettes use |                         |
|------------------------------------------------------------|-------------------------|-------------------------|-------------------------------|-------------------------|
|                                                            | Waves 3-4<br>n=1,611    | Waves 4-5<br>n=1,653    | Waves 3-4<br>n=2,467          | Waves 4-5<br>N=2,746    |
|                                                            | aOR (95% CI)            | aOR (95% CI)            | aOR (95% CI)                  | aOR (95% CI)            |
| <b>Age group</b>                                           |                         |                         |                               |                         |
| 18-24                                                      | Ref                     | Ref                     | Ref                           | Ref                     |
| 25-44                                                      | 1.85 (0.80-4.27)        | 0.37 (0.11-1.21)        | <b>0.62 (0.39-0.99)</b>       | 1.14 (0.73-1.79)        |
| 45-64                                                      | 0.70 (0.26-1.93)        | <b>0.34 (0.13-0.87)</b> | <b>0.52 (0.27-0.99)</b>       | 1.17 (0.70-1.97)        |
| 65+                                                        | 0.49 (0.06-3.82)        | 0.19 (0.01-2.63)        | <b>0.32 (0.13-0.80)</b>       | 0.88 (0.31-2.48)        |
| <b>Sex</b>                                                 |                         |                         |                               |                         |
| Female                                                     | Ref                     | Ref                     | Ref                           | Ref                     |
| Male                                                       | 1.82 (0.82-4.05)        | 0.83 (0.29-2.37)        | 0.99 (0.64-1.54)              | 0.84 (0.54-1.30)        |
| <b>Sexual Orientation</b>                                  |                         |                         |                               |                         |
| Straight                                                   | Ref                     | Ref                     | Ref                           | Ref                     |
| LGB                                                        | 1.02 (0.27-3.77)        | 1.04 (0.33-3.31)        | 1.29 (0.68-2.45)              | 1.35 (0.74-2.46)        |
| Not reported                                               | ¥                       | 2.12 (0.46-9.90)        | 1.54 (0.40-5.97)              | 0.22 (0.01-7.57)        |
| <b>Race/ethnicity</b>                                      |                         |                         |                               |                         |
| Non-Hispanic White                                         | Ref                     | Ref                     | Ref                           | Ref                     |
| Non-Hispanic Black                                         | 0.36 (0.06-2.16)        | 2.12 (0.46-9.90)        | <b>0.28 (0.12-0.66)</b>       | 1.14 (0.62-2.09)        |
| Hispanic                                                   | <b>0.14 (0.04-0.48)</b> | 0.67 (0.16-2.76)        | <b>0.44 (0.25-0.76)</b>       | 0.61 (0.36-1.04)        |
| Other races                                                | 0.54 (0.14-2.09)        | 1.34 (0.20-8.94)        | 1.02 (0.44-2.37)              | 0.57 (0.28-1.18)        |
| <b>Educational</b>                                         |                         |                         |                               |                         |
| Less than high school                                      | Ref                     | Ref                     | Ref                           | Ref                     |
| High school graduate                                       | 2.18 (0.52-9.14)        | 0.94 (0.32-2.72)        | 0.76 (0.44-1.32)              | 0.76 (0.42-1.38)        |
| Some college                                               | 1.83 (0.53-6.28)        | 1.37 (0.51-3.68)        | 0.76 (0.44-1.34)              | 0.62 (0.35-1.09)        |
| Bachelor's degree or more                                  | 3.43 (0.77-15.19)       | 3.11 (0.71-13.65)       | 0.61 (0.31-1.21)              | <b>0.37 (0.18-0.75)</b> |
| <b>Income</b>                                              |                         |                         |                               |                         |
| Less than \$25,000                                         | Ref                     | Ref                     | Ref                           | Ref                     |
| \$25,000 to \$49,999                                       | 0.34 (0.11-1.03)        | 0.58 (0.15-2.22)        | 0.74 (0.43-1.26)              | 0.85 (0.53-1.38)        |
| \$50,000 to \$99,999                                       | 0.73 (0.28-1.91)        | 0.50 (0.14-1.77)        | 0.77 (0.40-1.46)              | 0.58 (0.34-1.01)        |
| \$100,000 or more                                          | 0.45 (0.13-1.59)        | 1.62 (0.40-6.46)        | 0.50 (0.21-1.16)              | 0.76 (0.40-1.47)        |
| Not reported                                               | 0.68 (0.14-3.36)        | 0.42 (0.06-3.02)        | 0.71 (0.21-2.46)              | 1.22 (0.58-2.58)        |
| <b>Internalizing symptoms</b>                              |                         |                         |                               |                         |
| No                                                         | Ref                     | Ref                     | Ref                           | Ref                     |
| Yes                                                        | 1.99 (0.92-4.31)        | 0.53 (0.25-1.14)        | <b>0.64 (0.40-0.99)</b>       | 1.19 (0.83-1.69)        |
| <b>Externalizing symptoms</b>                              |                         |                         |                               |                         |
| No                                                         | Ref                     | Ref                     | Ref                           | Ref                     |
| Yes                                                        | 0.41 (0.08-2.10)        | 1.16 (0.26-5.20)        | 0.69 (0.22-2.16)              | 1.01 (0.51-2.02)        |
| <b>Current use of cigarettes/ENDS<sup>a</sup></b>          |                         |                         |                               |                         |
| No                                                         | Ref                     | Ref                     | Ref                           | Ref                     |
| Yes                                                        | <b>0.35 (0.17-0.72)</b> | 0.93 (0.32-2.73)        | 0.55 (0.28-1.09)              | 1.10 (0.63-1.92)        |
| <b>Current other tobacco use</b>                           |                         |                         |                               |                         |
| No                                                         | Ref                     | Ref                     | Ref                           | Ref                     |
| Yes                                                        | 0.97 (0.39-2.42)        | 0.25 (0.06-1.00)        | 0.62 (0.34-1.13)              | <b>0.41 (0.24-0.69)</b> |
| <b>Past 12-month cannabis use</b>                          |                         |                         |                               |                         |
| No                                                         | Ref                     | Ref                     | Ref                           | Ref                     |
| Yes                                                        | 0.87 (0.32-2.40)        | 1.12 (0.39-3.20)        | 0.72 (0.43-1.21)              | 1.13 (0.67-1.89)        |
| <b>Nicotine harm perception</b>                            |                         |                         |                               |                         |
| None or little harm                                        | Ref                     | Ref                     | Ref                           | Ref                     |
| Very harmful                                               | 1.09 (0.53-2.23)        | 0.80 (0.38-1.71)        | 1.07 (0.62-1.85)              | 0.67 (0.41-1.08)        |
| <b>ENDS/Cigarette absolute harm perception<sup>b</sup></b> |                         |                         |                               |                         |
| None or little harm                                        | Ref                     | Ref                     | Ref                           | Ref                     |
| Very harmful                                               | 0.27 (0.06-1.23)        | 1.10 (0.31-3.94)        | 1.06 (0.66-1.72)              | 0.69 (0.47-1.03)        |
| <b>Comparative harm perception</b>                         |                         |                         |                               |                         |
| Less harmful                                               | Ref                     | Ref                     | Ref                           | Ref                     |
| Equally or more harmful                                    | 0.71 (0.27-1.89)        | 0.78 (0.36-1.71)        | 0.93 (0.62-1.41)              | 1.08 (0.64-1.82)        |
| ENDS/cigarette nicotine dependence                         | <b>1.03 (1.01-1.05)</b> | <b>1.06 (1.03-1.09)</b> | <b>1.04 (1.03-1.05)</b>       | <b>1.02 (1.01-1.03)</b> |

Note. Regression models were weighted using wave 4 all-wave weights (for Waves 3-4) and wave 5 all-wave weights (for Waves 4-5). Bold-faced aOR indicates  $p < .05$ .

<sup>a</sup> First two columns show current established cigarettes smoking and the last two columns show current established ENDS use.

<sup>b</sup> First two columns indicate ENDS absolute harm perception, and the last two columns indicate cigarettes' absolute harm perception. ¥ No observation was in this category or model did not converge.

**Supplementary Table 7.** Multivariable analysis of ENDS or cigarettes use cessation among adults across W3-W4 and W4-W5, PATH Study

| Characteristics                                            | Cessation in ENDS use   |                         | Cessation in cigarette use |                         |
|------------------------------------------------------------|-------------------------|-------------------------|----------------------------|-------------------------|
|                                                            | Waves 3-4<br>n=2,335    | Waves 4-5<br>n=2,431    | Waves 3-4<br>n=8,607       | Waves 4-5<br>N=9,087    |
|                                                            | aOR (95% CI)            | aOR (95% CI)            | aOR (95% CI)               | aOR (95% CI)            |
| <b>Age group</b>                                           |                         |                         |                            |                         |
| 18–24                                                      | Ref                     | Ref                     | Ref                        | Ref                     |
| 25–44                                                      | 0.83 (0.54-1.27)        | 0.99 (0.58-1.69)        | <b>0.60 (0.43-0.85)</b>    | 0.54 (0.41-0.71)        |
| 45–64                                                      | 0.79 (0.47-1.35)        | 0.95 (0.53-1.69)        | <b>0.52 (0.35-0.77)</b>    | 0.41 (0.30-0.55)        |
| 65+                                                        | 0.85 (0.40-1.83)        | 1.46 (0.64-3.31)        | 0.74 (0.41-1.31)           | 0.93 (0.58-1.48)        |
| <b>Sex</b>                                                 |                         |                         |                            |                         |
| Female                                                     | Ref                     | Ref                     | Ref                        | Ref                     |
| Male                                                       | 0.99 (0.69-1.44)        | 0.98 (0.68-1.42)        | 0.95 (0.73-1.23)           | 1.07 (0.86-1.34)        |
| <b>Sexual Orientation</b>                                  |                         |                         |                            |                         |
| Straight                                                   | Ref                     | Ref                     | Ref                        | Ref                     |
| LGB                                                        | 1.17 (0.68-2.01)        | 0.67 (0.38-1.17)        | 0.99 (0.58-1.67)           | <b>0.67 (0.47-0.95)</b> |
| Not reported                                               | 1.90 (0.15-24.49)       | ¥                       | 0.95 (0.28-3.21)           | 1.10 (0.27-4.40)        |
| <b>Race/ethnicity</b>                                      |                         |                         |                            |                         |
| Non-Hispanic White                                         | Ref                     | Ref                     | Ref                        | Ref                     |
| Non-Hispanic Black                                         | 1.08 (0.52-2.24)        | 0.59 (0.31-1.10)        | 0.91 (0.64-1.28)           | <b>0.57 (0.40-0.81)</b> |
| Hispanic                                                   | 1.41 (0.83-2.41)        | 1.21 (0.65-2.24)        | 1.08 (0.72-1.62)           | 1.05 (0.74-1.47)        |
| Other races                                                | 1.08 (0.53-2.23)        | 0.73 (0.38-1.39)        | 0.63 (0.40-0.98)           | 1.28 (0.87-1.90)        |
| <b>Educational</b>                                         |                         |                         |                            |                         |
| Less than high school                                      | Ref                     | Ref                     | Ref                        | Ref                     |
| High school graduate                                       | 0.92 (0.57-1.49)        | 1.10 (0.63-1.92)        | 1.04 (0.66-1.65)           | 0.89 (0.62-1.27)        |
| Some college                                               | 0.97 (0.65-1.46)        | 1.48 (0.91-2.43)        | 1.30 (0.91-1.87)           | 1.25 (0.89-1.75)        |
| Bachelor's degree or more                                  | 0.71 (0.37-1.38)        | 1.34 (0.65-2.74)        | <b>2.48 (1.57-3.91)</b>    | <b>1.67 (1.12-2.48)</b> |
| <b>Income</b>                                              |                         |                         |                            |                         |
| Less than \$25,000                                         | Ref                     | Ref                     | Ref                        | Ref                     |
| \$25,000 to \$49,999                                       | 0.92 (0.59-1.42)        | 0.85 (0.50-1.45)        | 0.90 (0.69-1.18)           | 1.08 (0.80-1.45)        |
| \$50,000 to \$99,999                                       | 0.68 (0.46-1.01)        | 0.88 (0.51-1.51)        | 1.11 (0.80-1.55)           | 1.04 (0.77-1.41)        |
| \$100,000 or more                                          | <b>0.50 (0.29-0.88)</b> | 0.83 (0.44-1.56)        | 1.48 (0.98-2.26)           | <b>1.56 (1.06-2.31)</b> |
| Not reported                                               | 0.62 (0.26-1.47)        | 0.69 (0.27-1.76)        | 0.95 (0.48-1.90)           | 1.36 (0.86-2.14)        |
| <b>Internalizing symptoms</b>                              |                         |                         |                            |                         |
| No                                                         | Ref                     | Ref                     | Ref                        | Ref                     |
| Yes                                                        | 0.87 (0.56-1.36)        | 1.37 (0.93-2.02)        | 1.09 (0.83-1.43)           | 0.91 (0.73-1.15)        |
| <b>Externalizing symptoms</b>                              |                         |                         |                            |                         |
| No                                                         | Ref                     | Ref                     | Ref                        | Ref                     |
| Yes                                                        | 2.39 (0.99-5.74)        | 1.19 (0.61-2.33)        | 1.46 (0.87-2.46)           | 1.39 (0.95-2.03)        |
| <b>Current use of cigarettes/ENDS<sup>a</sup></b>          |                         |                         |                            |                         |
| No                                                         | Ref                     | Ref                     | Ref                        | Ref                     |
| Yes                                                        | <b>1.76 (1.22-2.55)</b> | <b>1.54 (1.01-2.34)</b> | 1.35 (0.94-1.95)           | 1.25 (0.91-1.73)        |
| <b>Current other tobacco use</b>                           |                         |                         |                            |                         |
| No                                                         | Ref                     | Ref                     | Ref                        | Ref                     |
| Yes                                                        | 1.06 (0.66-1.69)        | 1.24 (0.78-1.99)        | <b>1.45 (1.07-1.97)</b>    | <b>1.56 (1.18-2.07)</b> |
| <b>Past 12-month cannabis use</b>                          |                         |                         |                            |                         |
| No                                                         | Ref                     | Ref                     | Ref                        |                         |
| Yes                                                        | 0.92 (0.57-1.49)        | 0.73 (0.49-1.07)        | 0.97 (0.65-1.44)           | 0.89 (0.68-1.16)        |
| <b>Nicotine harm perception</b>                            |                         |                         |                            |                         |
| None or little harm                                        | Ref                     | Ref                     | Ref                        | Ref                     |
| Very harmful                                               | 1.12 (0.73-1.70)        | <b>1.72 (1.23-2.40)</b> | 1.02 (0.74-1.39)           | <b>1.35 (1.01-1.80)</b> |
| <b>ENDS/Cigarette absolute harm perception<sup>b</sup></b> |                         |                         |                            |                         |
| None or little harm                                        | Ref                     | Ref                     | Ref                        | Ref                     |
| Very harmful                                               | <b>2.07 (1.11-3.86)</b> | 0.94 (0.49-1.81)        | 1.31 (0.90-1.92)           | <b>1.58 (1.15-2.16)</b> |
| <b>Comparative harm perception</b>                         |                         |                         |                            |                         |
| Less harmful                                               | Ref                     | Ref                     | Ref                        | Ref                     |
| Equally or more harmful                                    | 1.42 (0.95-2.12)        | 1.16 (0.79-1.68)        | 1.00 (0.80-1.26)           | 0.89 (0.69-1.13)        |
| ENDS/cigarette nicotine dependence                         | <b>0.97 (0.96-0.98)</b> | <b>0.98 (0.7-0.99)</b>  | <b>0.98 (0.97-0.98)</b>    | <b>0.98 (0.98-0.99)</b> |

Note. Regression models were weighted using wave 4 all-wave weights (for Waves 3-4) and wave 5 all-wave weights (for Waves 4-5). Bold-faced aOR indicates  $p < .05$ .

<sup>a</sup> First two columns show current established cigarettes smoking and the last two columns show current established ENDS use.

<sup>b</sup> First two columns indicate ENDS absolute harm perception, and the last two columns indicate cigarettes' absolute harm perception. ¥ No observation was in this category or model did not converge.

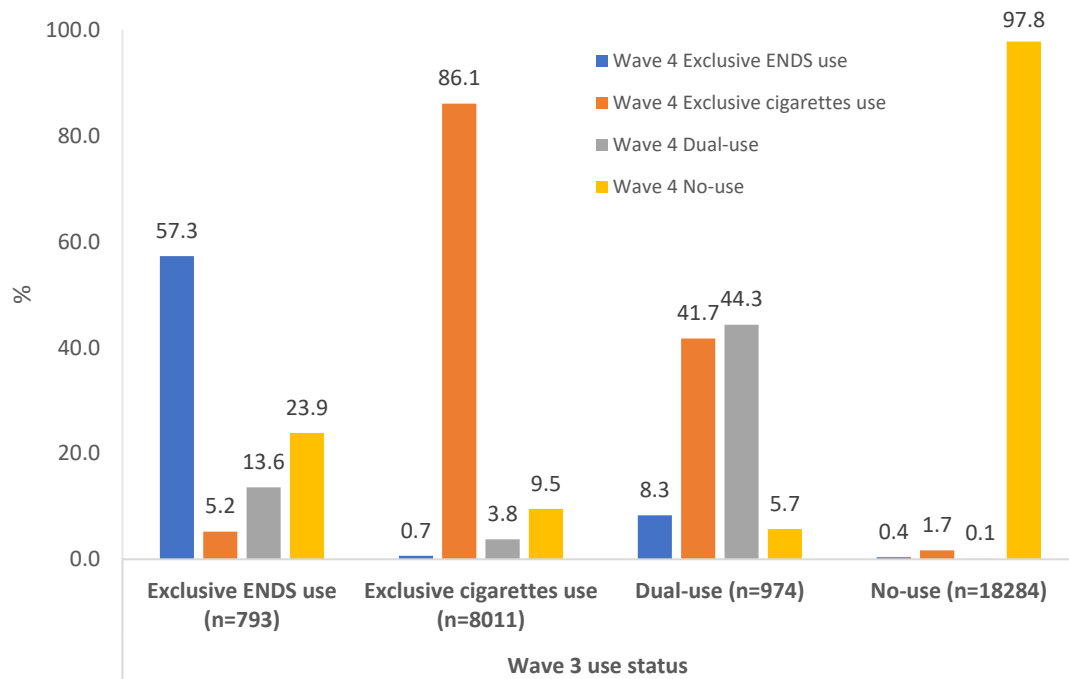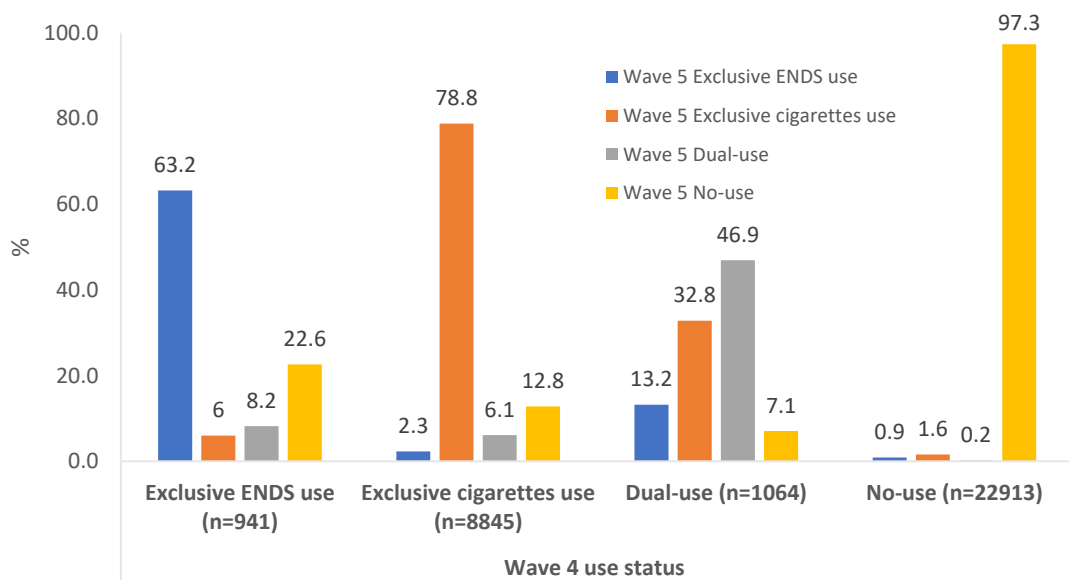

**Supplementary Figure 2.** Between products (ENDS to cigarettes or vice versa) transitions from W3-W4 (above) and W4-W5 (bottom), PATH Study

*Note.* These transitions illustrate only the current established use as well as the no-use of each product across waves.
